# Supplementary material for: (2,6-Dimethylphenyl)arsonic Acid Induces Apoptosis through the Mitochondrial Pathway, Downregulates XIAP, and Overcomes Multidrug Resistance to Cytostatic Drugs in Leukemia and Lymphoma Cells In Vitro
Source: MDPI journal article supplement (doi:10.3390/ijms25094713), 2024-04-26
Supplement: s1 [file s1]

## Supplementary Material

**Table S1. Drug resistant cell lines.** Origin, primary resistances and co-resistances against common chemotherapeutic drugs as well as the proposed resistance mechanisms (if applicable) are depicted for the resistant cell lines used in this study. NA = not applicable/mechanism not known.

| Cell line       | Parental cell line | Primary resistance | Co-resistances                                                                                                                                                                                                                  | Suggested resistance mechanism     |
|-----------------|--------------------|--------------------|---------------------------------------------------------------------------------------------------------------------------------------------------------------------------------------------------------------------------------|------------------------------------|
| <b>BeKa</b>     | Nalm-6             | Vincristine        | Colchicine, Daunorubicin, Doxorubicin, Epirubicin, Etoposide, Fludarabine, Idarubicin, Mitoxantrone, Paclitaxel, Vinblastine, Vindesine, Vinorelbine                                                                            | Overexpression of P-glycoprotein 1 |
| <b>LiKa</b>     | Nalm-6             | Daunorubicin       | Colchicine, Dexamethasone, Doxorubicin, Epirubicin, Etoposide, Fludarabine, Idarubicin, Mitoxantrone, Paclitaxel, Prednisolone, Vinblastine, Vincristine, Vindesine, Vinorelbine                                                | Overexpression of P-glycoprotein 1 |
| <b>NaKu</b>     | Nalm-6             | Prednisolone       | 4-OH Cyclophosphamide, Carboplatin, Cisplatin, Cladribine, Colchicine, Cytarabine, Daunorubicin, Dexamethasone, Doxorubicin, Epirubicin, Etoposide, Idarubicin, Ifosfamide, Oxaliplatin, Vindesine                              | Downregulation of FLT-3            |
| <b>MaKo</b>     | Nalm-6             | Cytarabine         | 4-OH Cyclophosphamide, Cladribine, Clofarabine, Vincristine                                                                                                                                                                     | Downregulation of FOXI-1           |
| <b>BiBo</b>     | BJAB mock          | Vincristine        | 4-OH Cyclophosphamide, Colchicine, Cytarabine, Daunorubicin, Paclitaxel, Vinblastine, Vindesine, Vinorelbine                                                                                                                    | Overexpression of Bcl-2            |
| <b>7CCA</b>     | BJAB mock          | Doxorubicin        | Cisplatin, Cladribine, Clofarabine, Colchicine, Cytarabine, Daunorubicin, Epirubicin, Etoposide, Fludarabine, Fluorouracil, Idarubicin, Mitoxantrone, Oxaliplatin, Paclitaxel, Vinblastine, Vincristine, Vindesine, Vinorelbine | Downregulation of Caspase-3        |
| <b>NiWi-Dau</b> | K562               | Daunorubicin       | Colchicine, Doxorubicin, Epirubicin, Idarubicin, Mitoxantrone, Paclitaxel, Prednisolone, Vinblastine, Vincristine, Vindesine, Vinorelbine                                                                                       | Downregulation of Harakiri         |
